# Supplementary material
Source: PubMed Central journal article supplement (PMC5774585)
Supplement: NIHMS75700-supplement-Figures.pdf [file NIHMS75700-supplement-Figures.pdf]

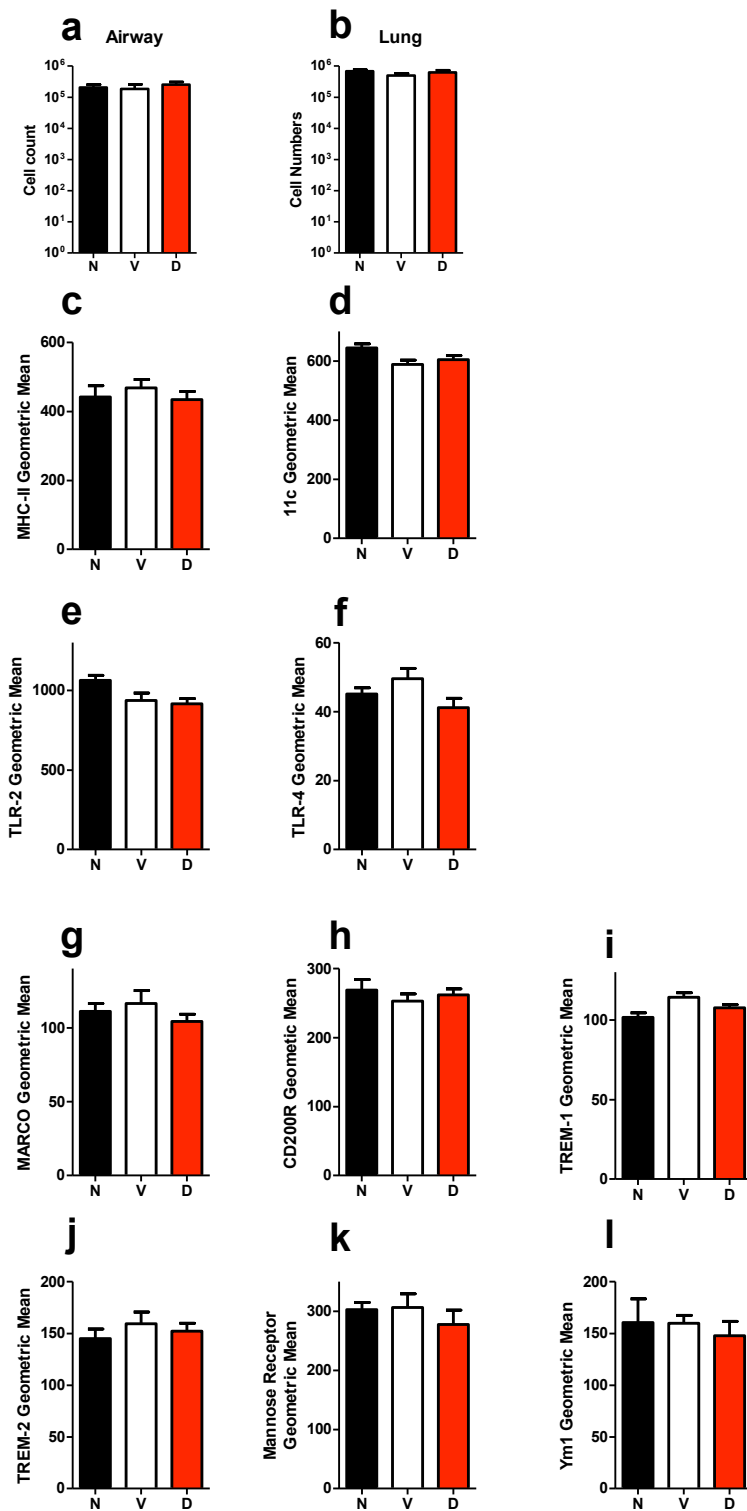

**Supplementary Figure 1. Diazepam does not affect immune homeostasis in the lung.** Mice were pre-treated with diazepam (D, 2 mg kg<sup>-1</sup>), vehicle (V, 4% ethanol in PBS) or left untreated (N, naïve) and 7 days later total airway (a) and lung (b) cellularity assessed by trypan blue exclusion. Airway alveolar macrophages were also assessed for **c**, MHC-II, **d**, CD11c, **e**, TLR-2, **f**, TLR-4, **g**, MARCO, **h**, CD200R, **i**, TREM-1, **j**, TREM-2, **k**, mannose receptor, and **l**, YM-1 by flow cytometry. Results presented as the geometric mean of fluorescence ( $\pm$  s.e.m) of n=5 mice/group.

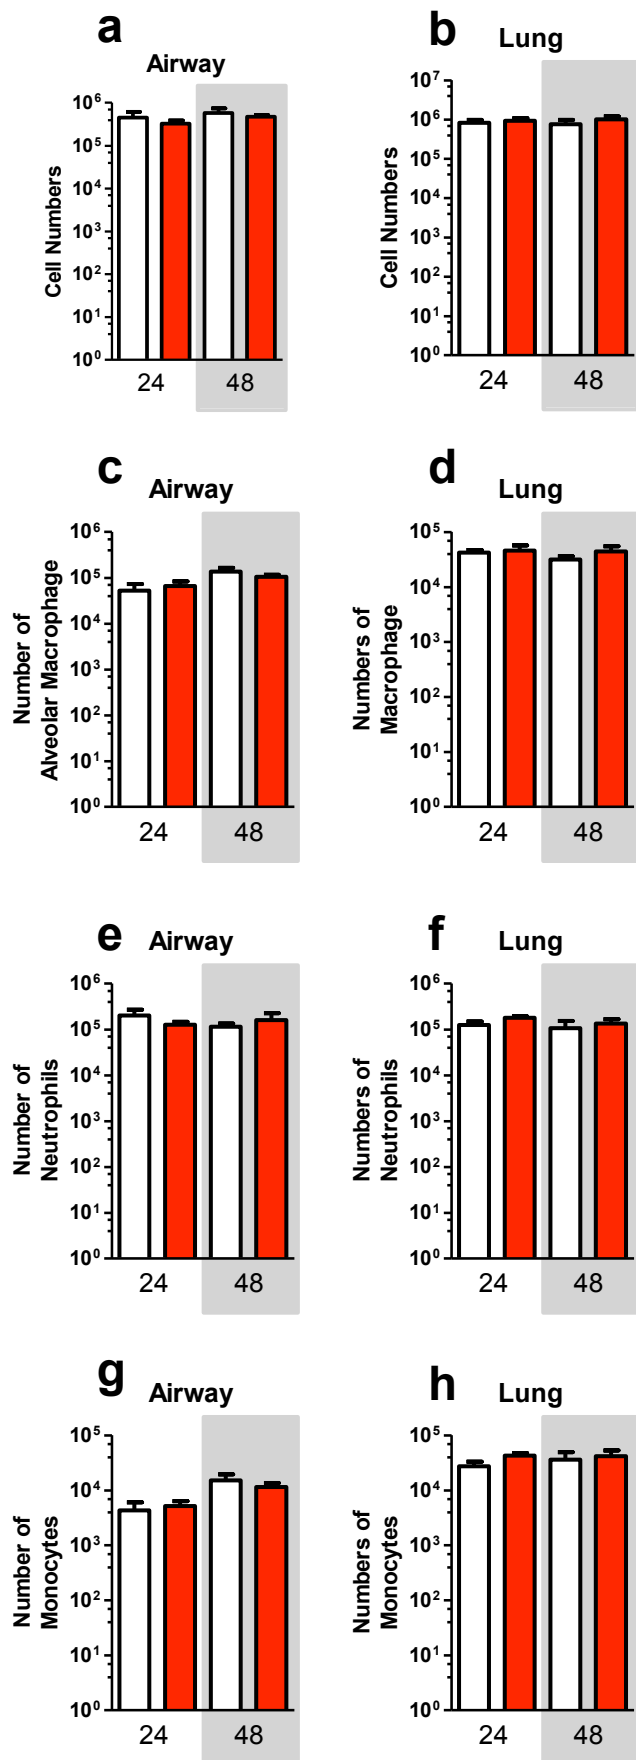

**Supplementary Figure 2. Diazepam pre-treatment does not affect cell recruitment post-infection.** Mice were administered diazepam (2 mg kg<sup>-1</sup>) (red bar) or vehicle (4% ethanol in PBS) (white bar) twice daily for 7 days prior to and during infection with *Streptococcus pneumoniae*. Total viable cell counts in the airway (a) or lung (b) were enumerated by trypan blue exclusion at 24 and 48 hours after the infection. The number of airway macrophages (c), neutrophils (e) and monocytes (g) were assessed by flow cytometry, as were macrophages (d), neutrophils (f) and monocytes (h) in homogenised lung. All graphs show mean ± s.e.m. n = 5/group.

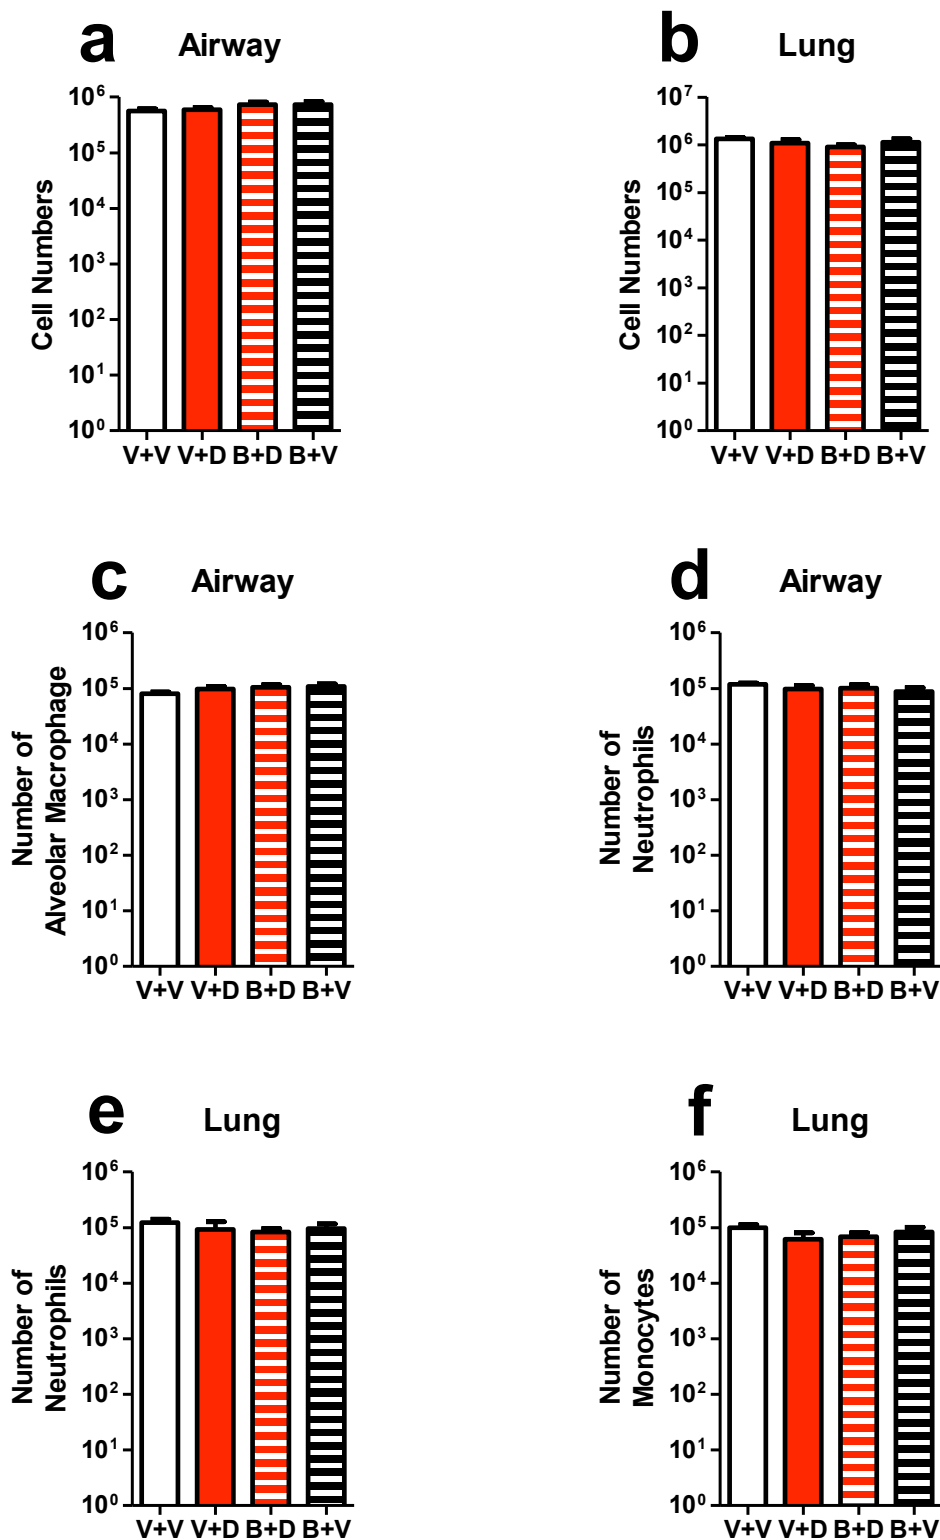

**Supplementary Figure 3. Modulation of GABA<sub>A</sub> receptors does not affect cell recruitment during infection.** Mice were treated with the vehicle for bicuculline and 30 minutes later given the vehicle for diazepam (PBS) (V+V) or diazepam (2 mg kg<sup>-1</sup>) (V+D). Two other groups received bicuculline followed by diazepam (B+D) or the vehicle for diazepam (4% ethanol in PBS) (B+V). Total cell counts in the (a) airway or (b) lung were assessed 48 hours after intranasal *Streptococcus pneumoniae* infection by trypan blue exclusion and the number of airway macrophages (c) and neutrophils (d) or lung neutrophils (e) and monocytes (f) assessed by flow cytometry. n=12-14 mice/group. All graphs show the mean ± s.e.m (n=8/group).

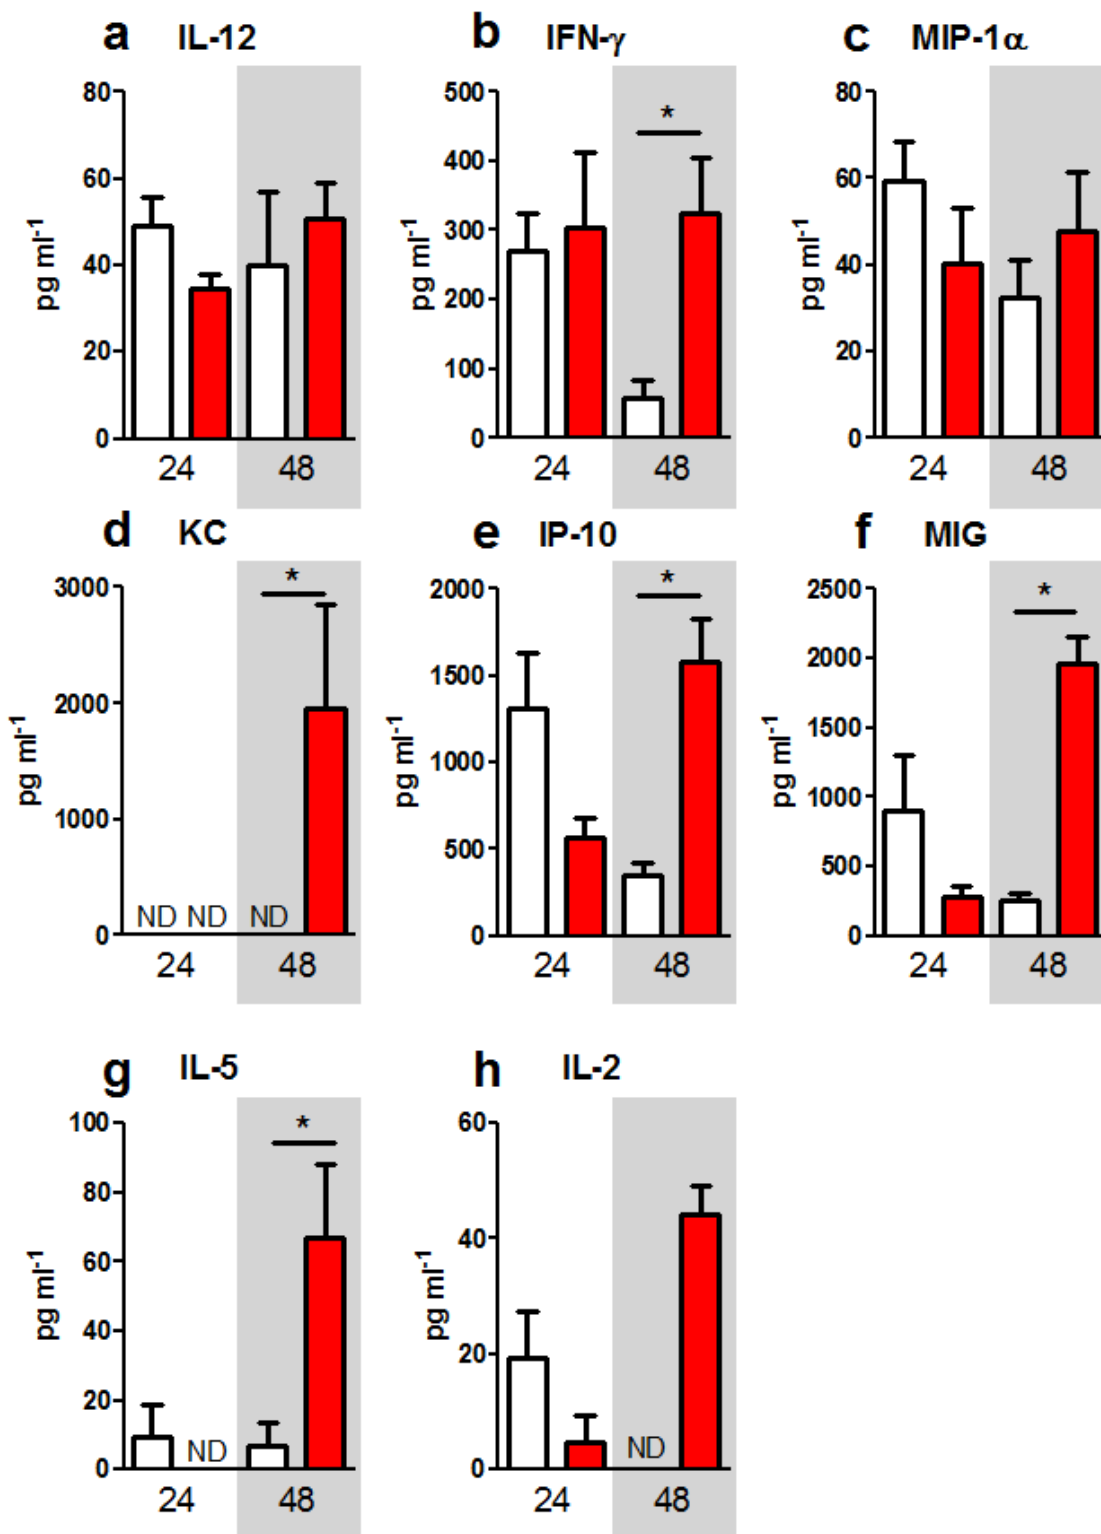

**Supplementary Figure 4. Effect of Diazepam on cytokine production post-infection.** Mice were administered diazepam (2 mg kg<sup>-1</sup>) (red bar) or vehicle (4% ethanol in PBS) (white bar) twice daily for 7 days prior to and during infection with *Streptococcus pneumoniae*. 24 or 48 hours after infection, IL-12 (a), IFN- $\gamma$  (b) MIP-1 $\alpha$  (c) KC (d), IP-10 (e), MIG (f), IL-5 (g) and IL-2 (h) were assessed by luminex on airway lavage. \*p<0.05 vs. vehicle. All graphs show the mean  $\pm$  s.e.m (n = 5/group). ND = not detected.

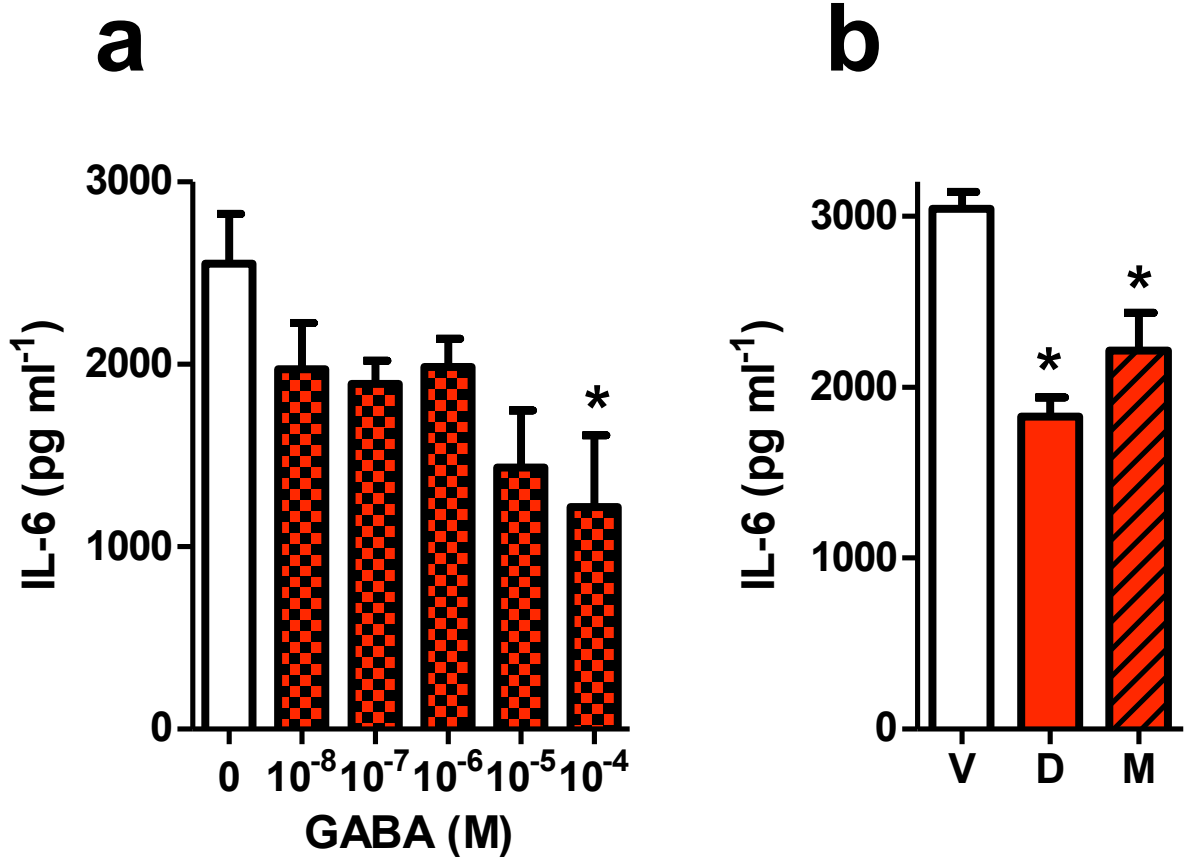

**Supplementary Figure 5. GABA<sub>A</sub> modulators reduce alveolar macrophage production of IL-6 *ex-vivo*.** Airway macrophages were recovered by lavage and incubated with the dose of GABA shown (a), vehicle (V), diazepam (D, 10 $\mu$ M) or the GABA<sub>A</sub> agonist muscimol (100 $\mu$ M) (b) together with LPS (100 ng ml<sup>-1</sup>). IL-6 release was quantified by ELISA 16 hours later. All graphs show mean  $\pm$  s.e.m (n = 4/treatment). \*p<0.05 versus vehicle.

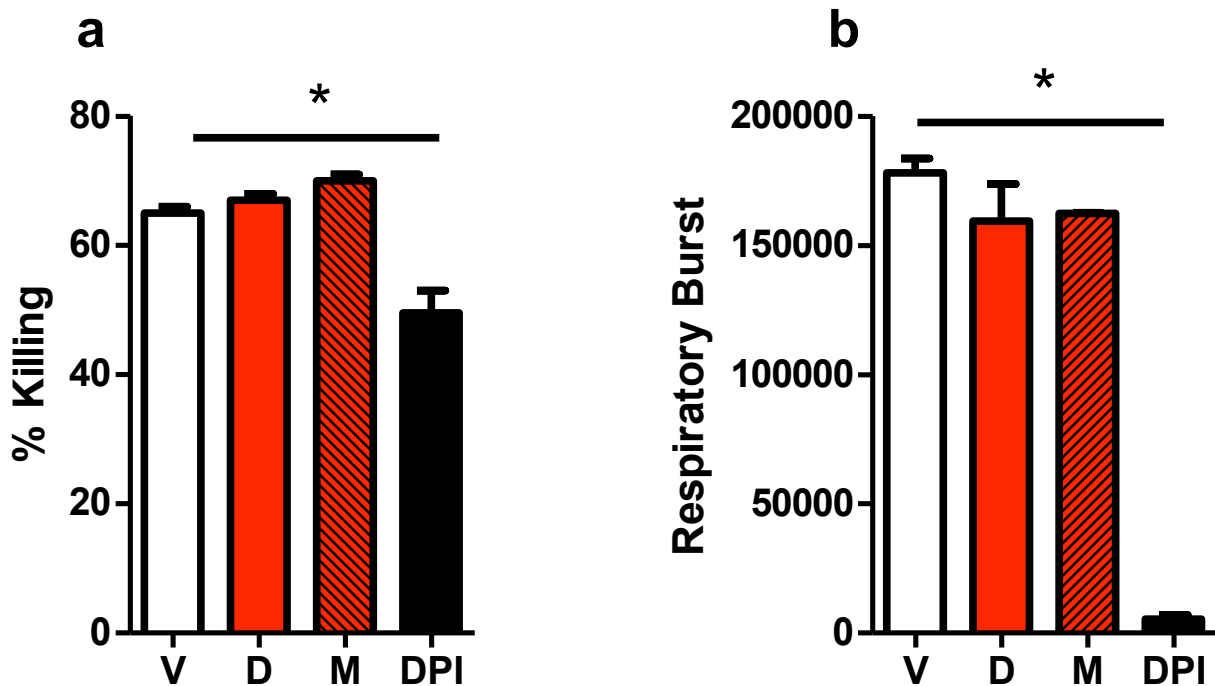

**Supplementary Figure 6. Neutrophil responses are not affected by GABA<sub>A</sub> modulators.**

Human neutrophils were incubated with GABA<sub>A</sub> modulators, diazepam (D, 10 $\mu$ M) or the GABA<sub>A</sub> agonist muscimol (M, 100 $\mu$ M) and killing of *Staphylococcus aureus* (a) and Phorbol 12-myristate 13-acetate stimulated respiratory burst *ex-vivo* (b) compared to a vehicle control. As a positive control on both of these processes neutrophils were incubated with the NADPH oxidase inhibitor diphenyliodonium (DPI). Results represent the mean  $\pm$  s.e.m. of n = 3/group. \*p<0.05 versus vehicle.
